# Supplementary material
Source: Springer Nature journal article supplement (https://www.springermedizin.de/resource/supplementary/12982_2008_73_MOESM1_ESM.pdf/9604396)

2  
hp3  
DENT-O-SEPT®

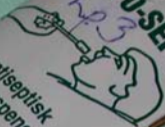

Antiseptisk  
engangspensel  
for munhygiene

Tilsatt: Glycerol  
antiseptisk  
munnvann

Premoistered  
foam swab for  
mouth hygiene

Saturated  
with glycerine  
and mouthwater

**snøgg**

Snøgg Industri AS  
4671 Mosby  
Made in Norway

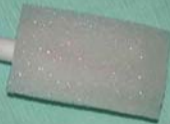

Supplement: MOESM1 [file 9604396]
